# Supplementary material
Source: Research Square preprint supplement (doi:10.21203/rs.3.rs-9212654/v1)
Supplement: Supplementary file 1 [file 0004fedfdfb76d772c907e51.docx]

| **Table S5.** Data used on the complete mitochondrial genome | | |
| --- | --- | --- |
| of*Schistosoma japonicum* | |  |
| **Species** | **Accession** | **Location** |
| *S. japonicum* | KU196305.1 | Anhui Guich, China |
| *S. japonicum* | KU196307.1 | Anhui Gichi, China |
| *S. japonicum* | KU196309.1 | Anhui Gichi, China |
| *S. japonicum* | KU196313.1 | Anhui Tongling, China |
| *S. japonicum* | KU196347.1 | Anhui Tongling, China |
| *S. japonicum* | KU196318.1 | Hubei, China |
| *S. japonicum* | KU196328.1 | Hunan Changde, China |
| *S. japonicum* | KU196338.1 | Hunan Yueyang, China |
| *S. japonicum* | KU196317.1 | Hunan Yueyang, China |
| *S. japonicum* | KU196348.1 | Indonesia |
| *S. japonicum* | KU196359.1 | Japan |
| *S. japonicum* | KU196367.1 | Jiangxi, China |
| *S. japonicum* | KU196379.1 | the Philippines |
| *S. japonicum* | KU196389.1 | Sichuan, China |
| *S. japonicum* | KU196408.1 | Yunnan, China |
| *S. japonicum* | KU196398.1 | Taiwan |
| *S. indicum* | NC_047240.1 | Bangladesh |
| *S.: Schistosoma* |  |  |
