# Supplementary material
Source: Research Square preprint supplement (doi:10.21203/rs.3.rs-9212654/v1)
Supplement: Supplementary file 2 [file 617034c7489cf059254b6d99.docx]

| **Table S1.** Data used on the locus ND1 for relationships between | | |
| --- | --- | --- |
| *Schistosoma sinensium*and*Schistosoma japonicum* | | |
| **Species** | **Accession** | **Location** |
| *S. sinensium* | AF465913.1 | Sichuan, China |
| *S. japonicum* | FJ852203.1 | Jiangxi, China |
| *S. japonicum* | FJ852216.1 | Yunnan, China |
| *S. japonicum* | FJ852220.1 | Sichuan, China |
| *S. japonicum* | FJ852232.1 | Anhui Tongling, China |
| *S. japonicum* | KP793743.1 | Anhui Guichi, China |
| *S. japonicum* | FJ852250.1 | Jiangsu, China |
| *S. japonicum* | FJ852248.1 | Hubei, China |
| *S. japonicum* | KP793758.1 | Hunan Yueyang, China |
| *S. japonicum* | FJ852245.1 | Hunan Changde, China |
| *S. japonicum* | KP793776.1 | Taiwan |
| *S. indicum* | NC_047240.1 | Bangladesh |
| *S.: Schistosoma* |  |  |
