# Supplementary material
Source: Research Square preprint supplement (doi:10.21203/rs.3.rs-9212654/v1)
Supplement: Supplementary file 3 [file 6ad149392e8eada119479b5a.docx]

| **Table S2.** Data used on the locus ND1 of*Schistosoma* | | |
| --- | --- | --- |
| *japonicum* |  |  |
| **Species** | **Accession** | **Location** |
| *S. japonicum* | KP793743.1 | Anhui Guichi, China |
| *S. japonicum* | KP793747.1 | Anhui Tongling, China |
| *S. japonicum* | KP793749.1 | Hubei, China |
| *S. japonicum* | KP793756.1 | Hunan Changde, China |
| *S. japonicum* | KP793758.1 | Hunan Yueyang, China |
| *S. japonicum* | KP793759.1 | Hunan Yueyang, China |
| *S. japonicum* | KP793777.1 | Indonesia 1 |
| *S. japonicum* | KP793778.1 | Indonesia 2 |
| *S. japonicum* | KP793779.1 | Indonesia 3 |
| *S. japonicum* | KP793780.1 | Japan |
| *S. japonicum* | KP793763.1 | Jiangxi, China |
| *S. japonicum* | KP793783.1 | the Philippines |
| *S. japonicum* | KP793765.1 | Sichuan, China |
| *S. japonicum* | KP793769.1 | Yunnan, China |
| *S. japonicum* | KP793776.1 | Taiwan |
| *S. indicum* | NC_247240.1 | Bangladesh |
| *S.: Schistosoma* |  |  |
