# Supplementary material
Source: Research Square preprint supplement (doi:10.21203/rs.3.rs-9212654/v1)
Supplement: Supplementary file 4 [file 7f6d86a745f470e06f49901b.docx]

| **Table S4.** Data use on the locus COX3 and the complete | | |
| --- | --- | --- |
| mintochondrial genome in*Schistosoma japonicum* | | |
| **Species** | **Accession** | **Location** |
| *S. japonicum* | EU927628.1 | Jiangxi, China |
| *S. japonicum* | EU927627.1 | Jiangsu, China |
| *S. japonicum* | EU927612.1 | Anhui, China |
| *S. japonicum* | EU927635.1 | Sichuan, China |
| *S. japonicum* | JQ781214.1 | the Philippines |
| *S. japonicum* | JQ781215.1 | Japan |
| *S. japonicum* | KU196357.1 | Indonesia |
| *S. japonicum* | KF279410.1 | Taiwan |
| *S. japonicum* | EU927625.1 | Hunan, China |
| *S. japonicum* | EU927619.1 | Hubei, China |
| *S. japonicum* | EU927638.1 | Yunnan, China |
| *S.: Schistosoma* |  |  |
