# Supplementary material
Source: Research Square preprint supplement (doi:10.21203/rs.3.rs-9212654/v1)
Supplement: Supplementary file 5 [file 8be39b11715d44267621477f.docx]

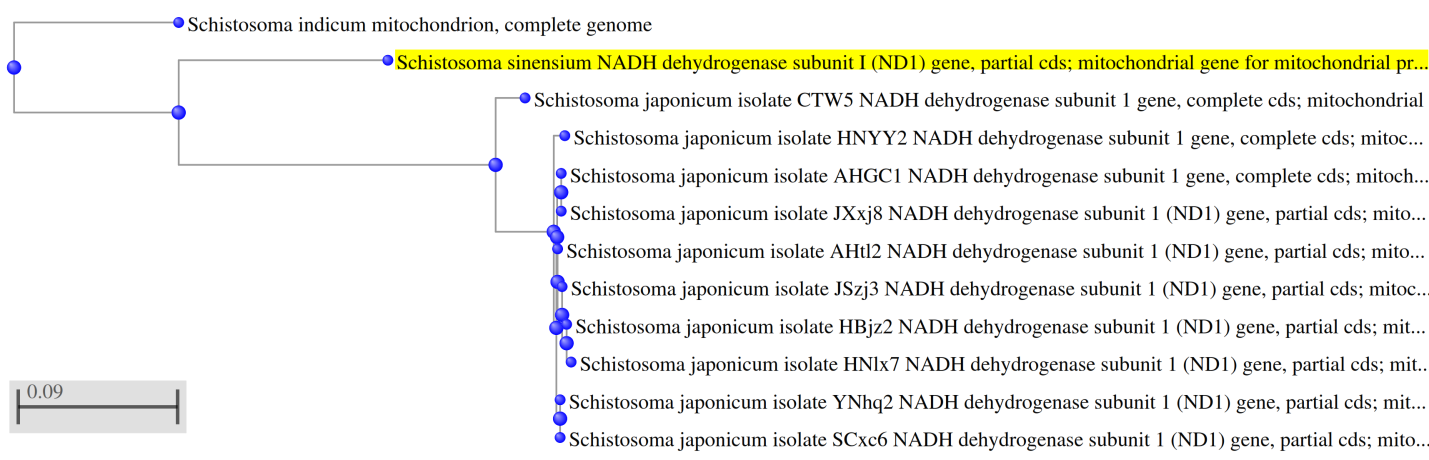


**A.** Cladogram from NCBI BLAST.


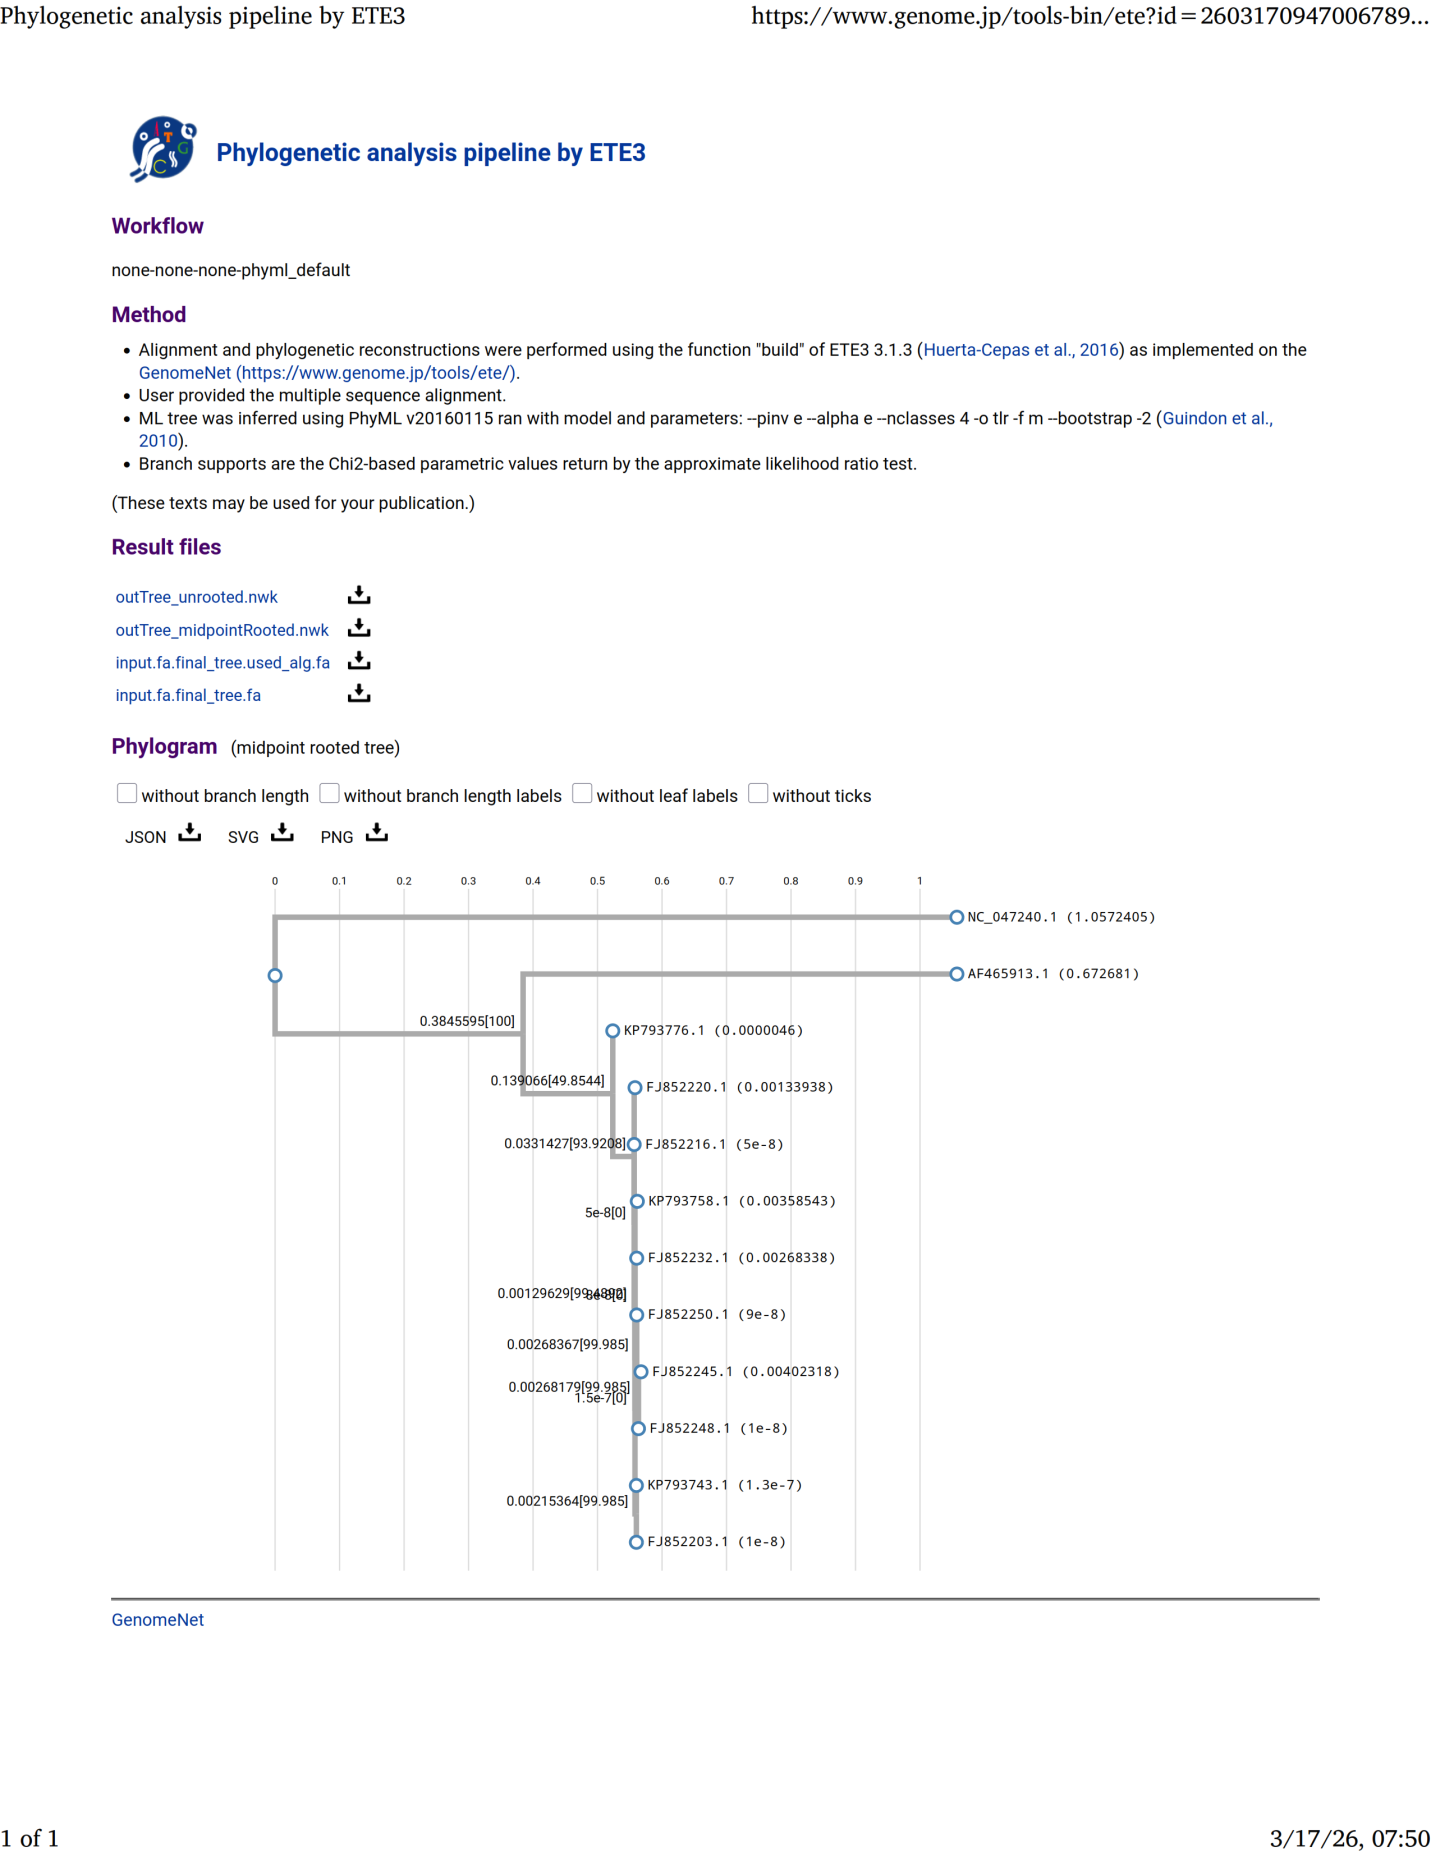
**B.** Cladogram from CLUSTALW and PhyML.

**Figure S1.** Cladogram A and Cladogram B are almost identic.
