# Supplementary material
Source: Research Square preprint supplement (doi:10.21203/rs.3.rs-9212654/v1)
Supplement: Supplementary file 6 [file d15cc2198e60843ab0715e4b.docx]

| **Table S3.** Data used on the locus ND4 of*Schistosoma* | | |
| --- | --- | --- |
| *japonicum* |  |  |
| **Species** | **Accession** | **Location** |
| *S. japonicum* | KP793785.1 | Anhui Guichi, China |
| *S. japonicum* | KP793789.1 | Anhui Tongling, China |
| *S. japonicum* | KP793791.1 | Hubei, China |
| *S. japonicum* | KP793798.1 | Hunan Changde, China |
| *S. japonicum* | KP793800.1 | Hunan Changde, China |
| *S. japonicum* | KP793801.1 | Hunan Yueyang, China |
| *S. japonicum* | KP793819.1 | Indonesia 1 |
| *S. japonicum* | KP793820.1 | Indonesia 2 |
| *S. japonicum* | KP793821.1 | Indonesia 3 |
| *S. japonicum* | KP793822.1 | Japan |
| *S. japonicum* | KP793805.1 | Jiangxi, China |
| *S. japonicum* | KP793825.1 | thePhilippines |
| *S. japonicum* | KP793807.1 | Sichuan, China |
| *S. japonicum* | KP793811.1 | Yunnan, China |
| *S. japonicum* | KP793818.1 | Taiwaqn |
| *S. indicum* | NC_047240.1 | Bangladesh |
| *S.: Schistosoma* |  |  |
